# Supplementary material
Source: PubMed Central journal article supplement (PMC3805049)
Supplement: NIHMS429847-supplement-SuppFigs.pdf [file NIHMS429847-supplement-SuppFigs.pdf]

# Analysis of VEGF-C and NRP-2 expression following depletion by siRNA

**A.**

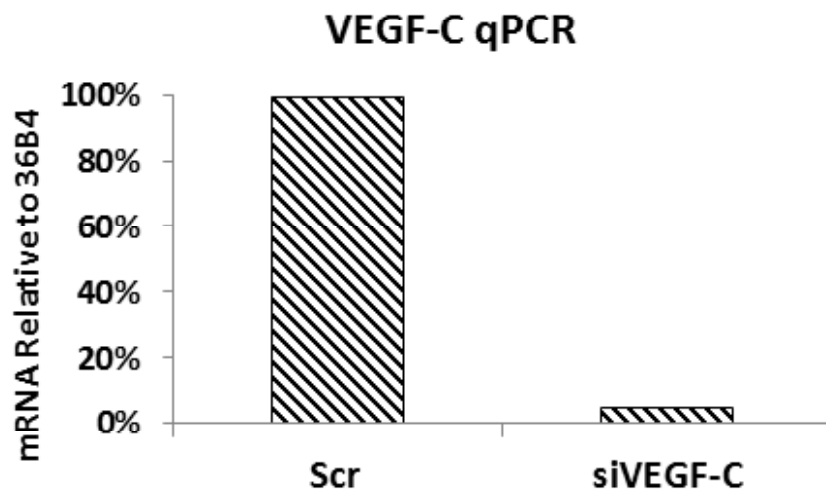

**C.**

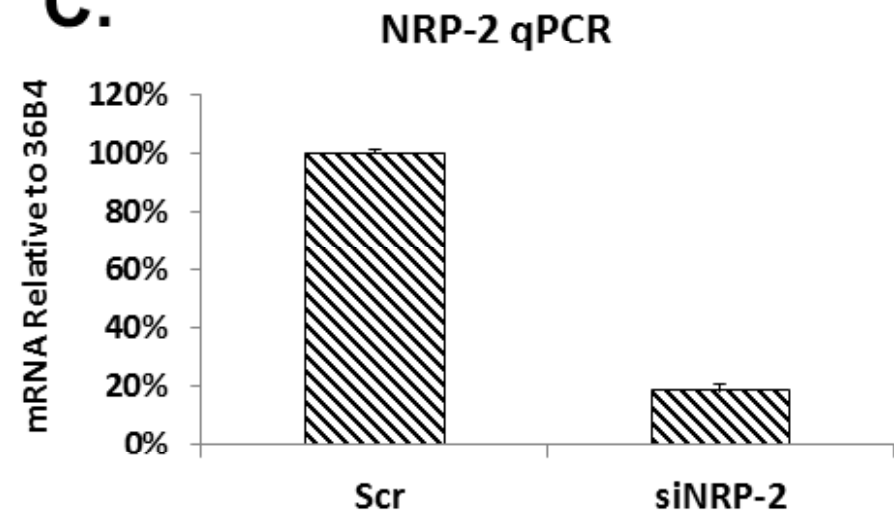

**B.**

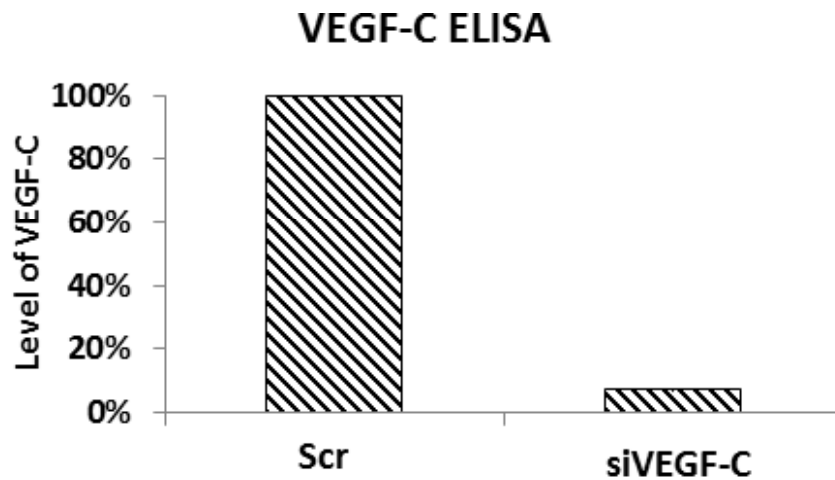

**D.**

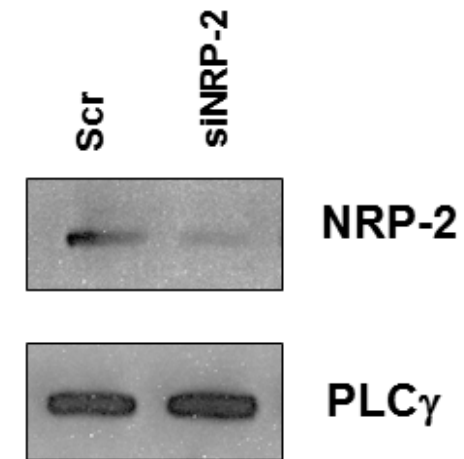

**Supplemental figure 1**

**qPCR and ELISA analysis of VEGF-C expression following treatment with specific siRNAs, siVEGF-C-1 and siVEGF-C-2**

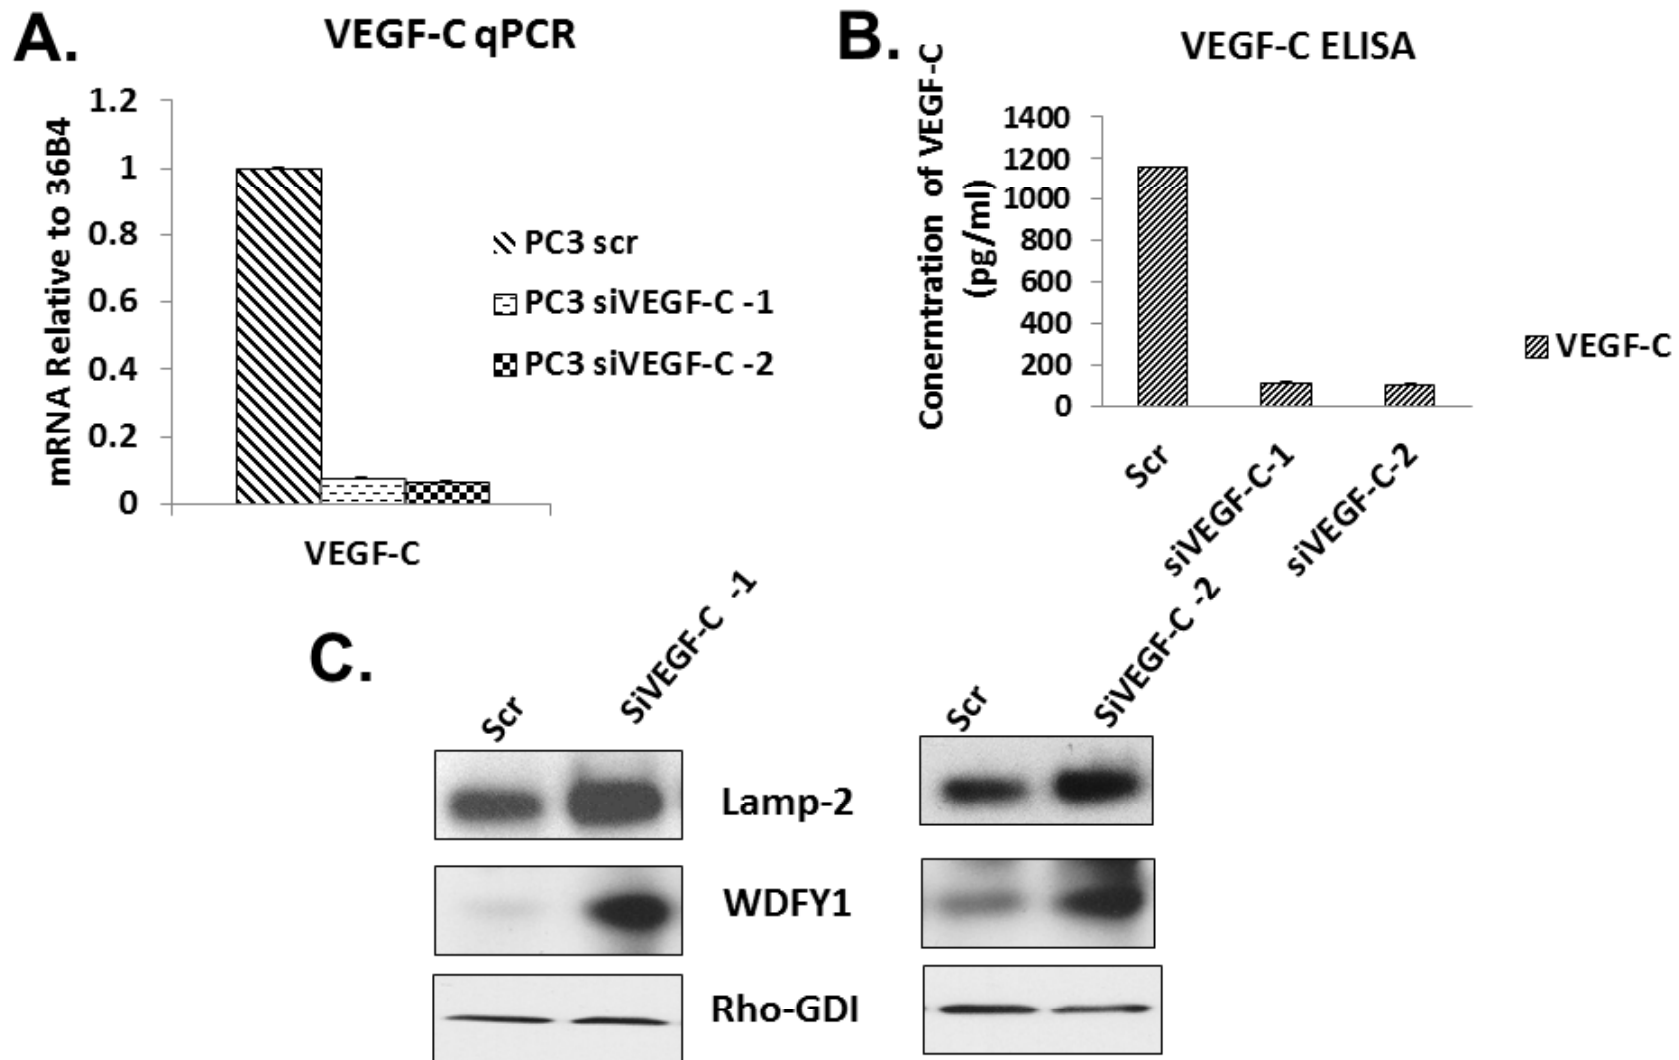

**Supplemental Figure 2**

**Representative confocal microscopy images illustrating the effects of VEGF-C-/NRP-2-depletion on autophagosomal trafficking**

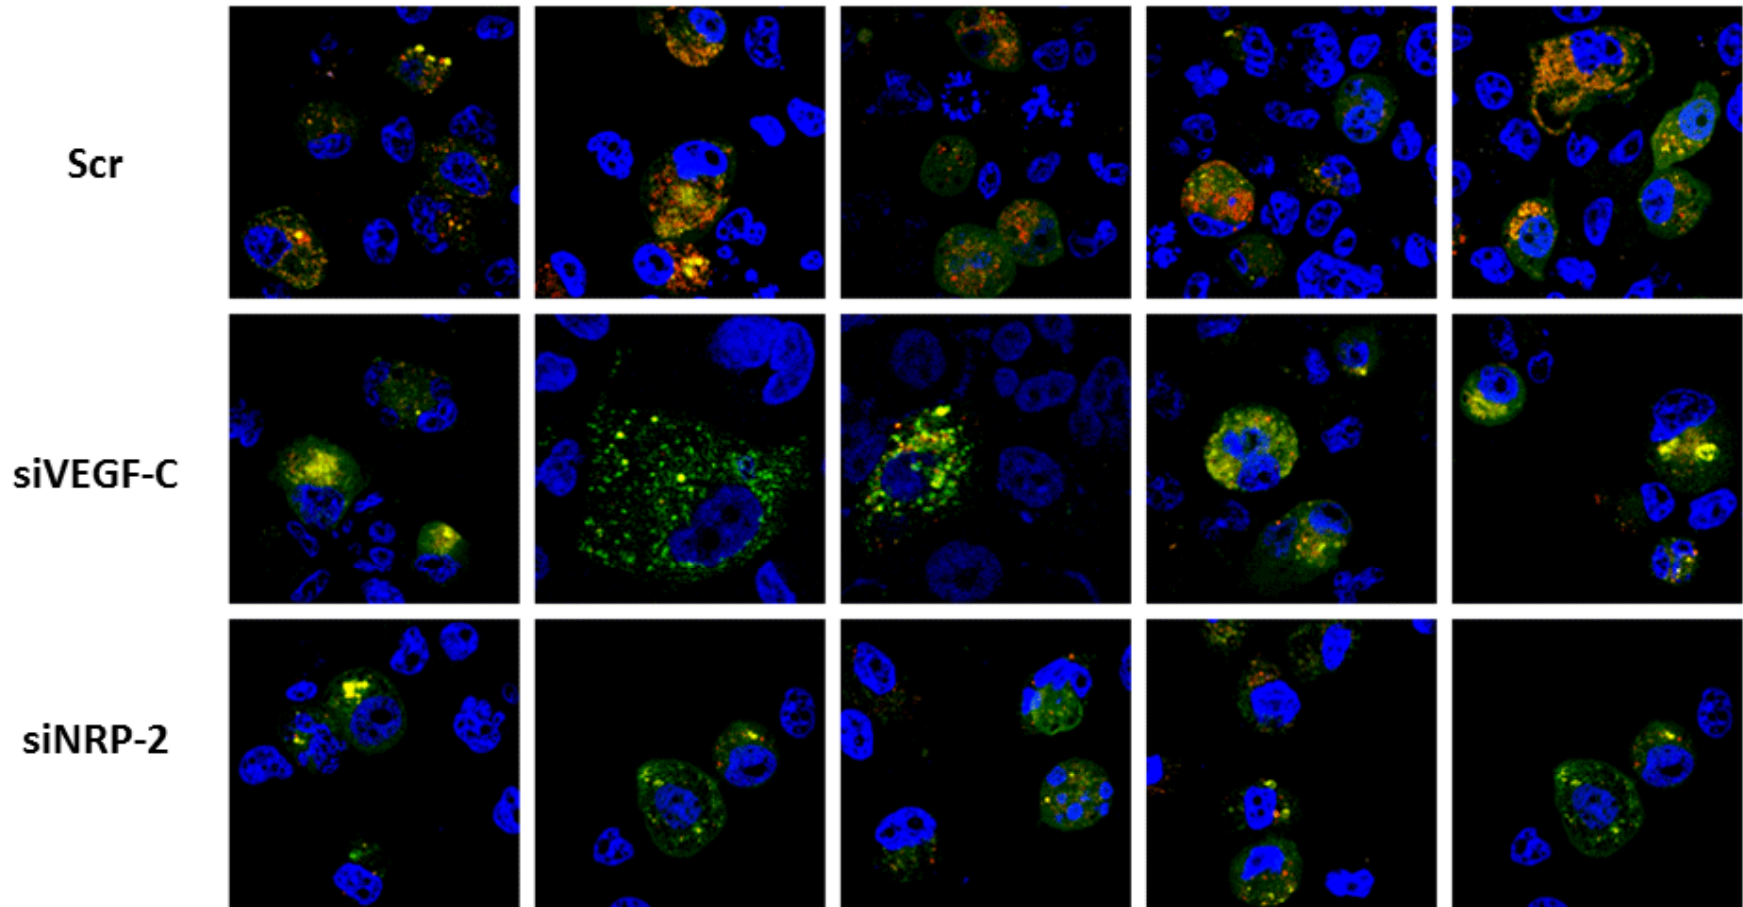

**Supplemental figure 3**

## The effects of VEGF-A depletion on the level of WDFY-1 and LAMP-2

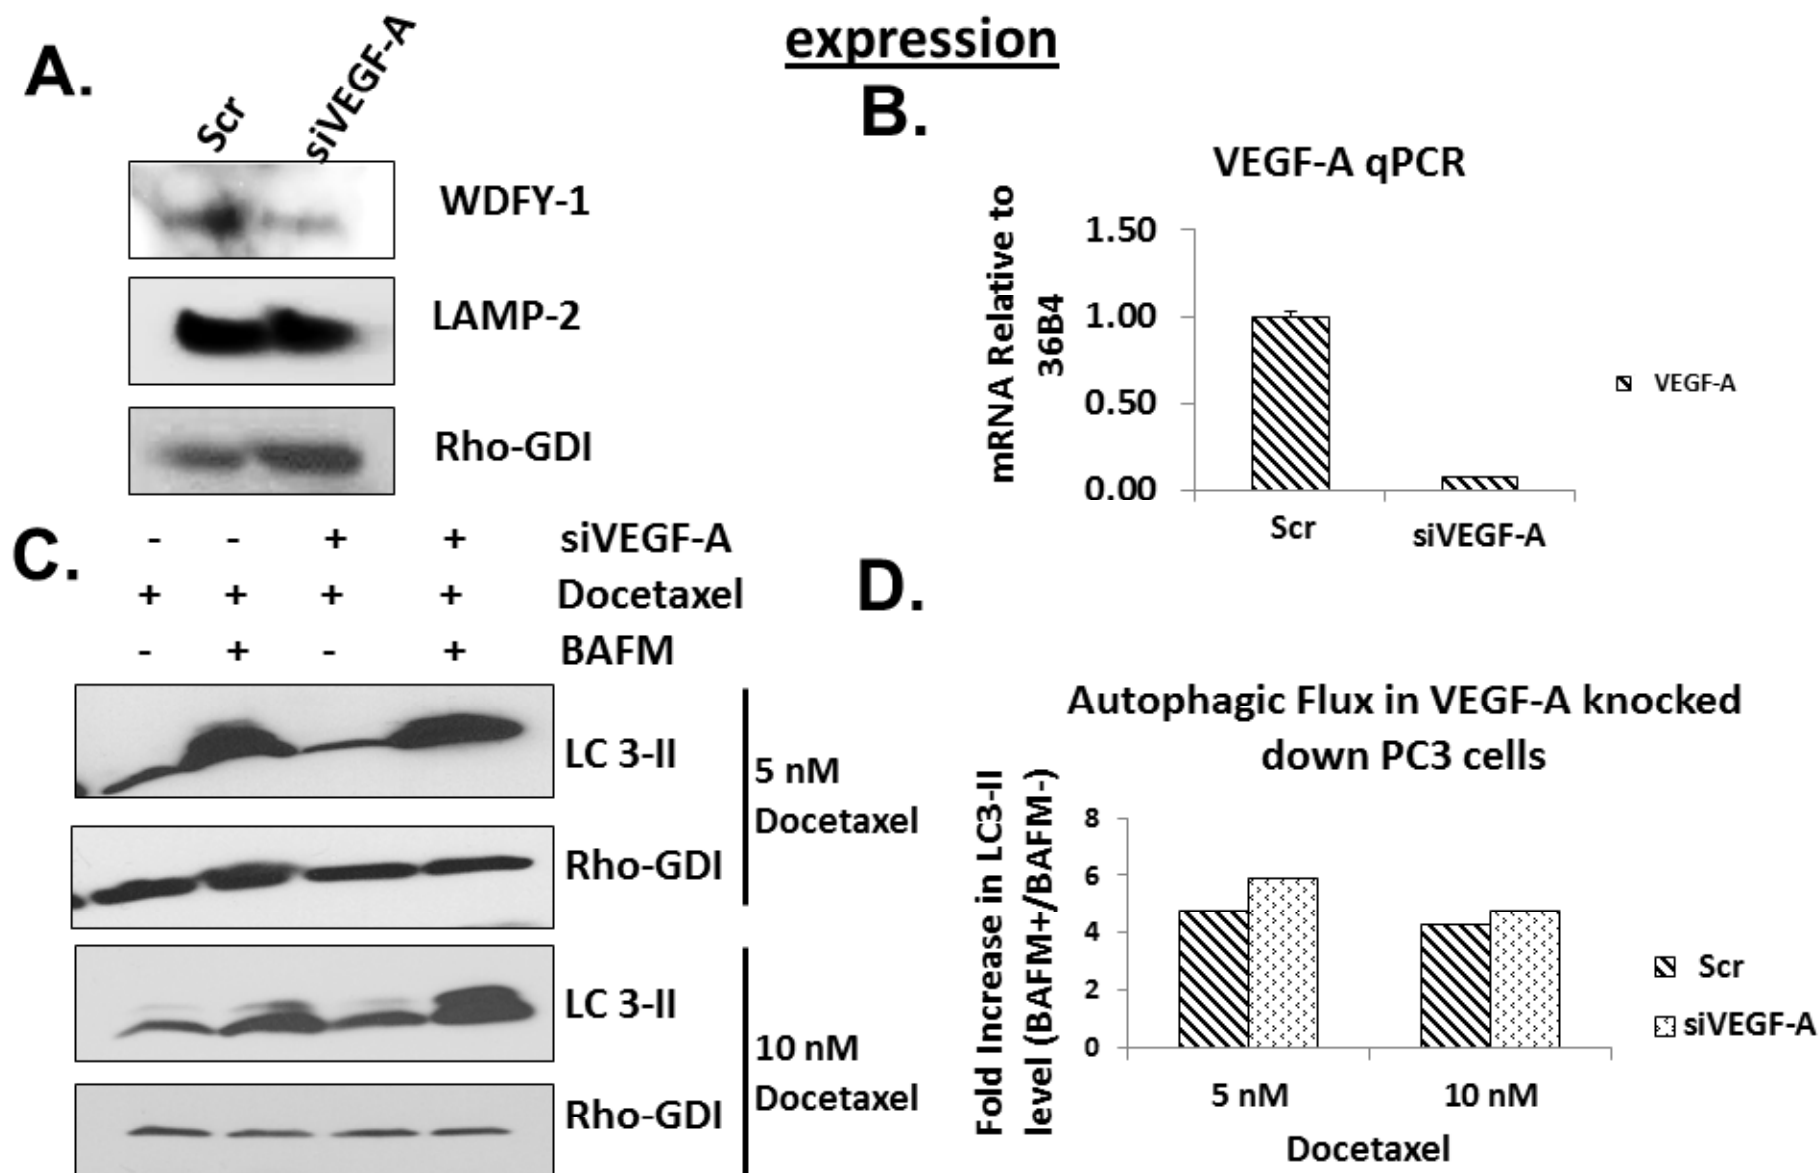

Supplemental Figure 4

# The effects of VEGF-C/NRP-2 Depletion or Blockade on Autophagic Flux in other Cancer Cell Lines

**A.**

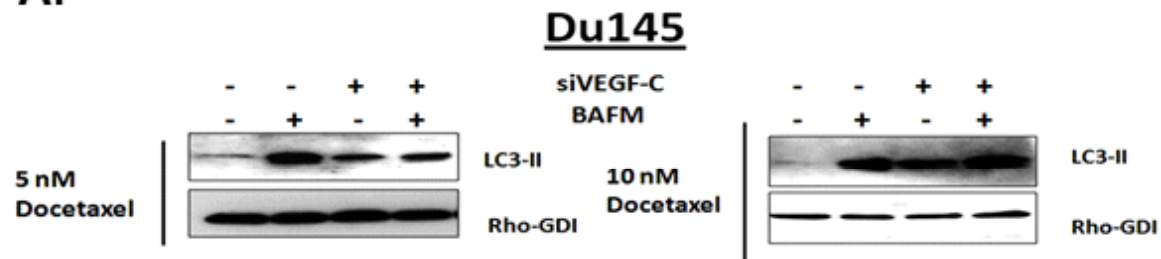

**B.**

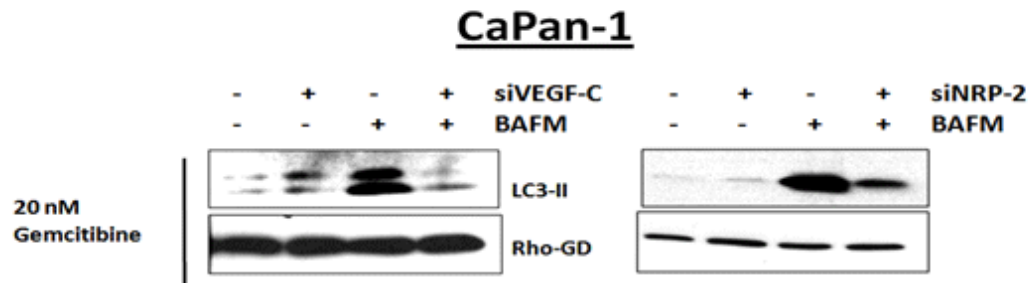

**C.**

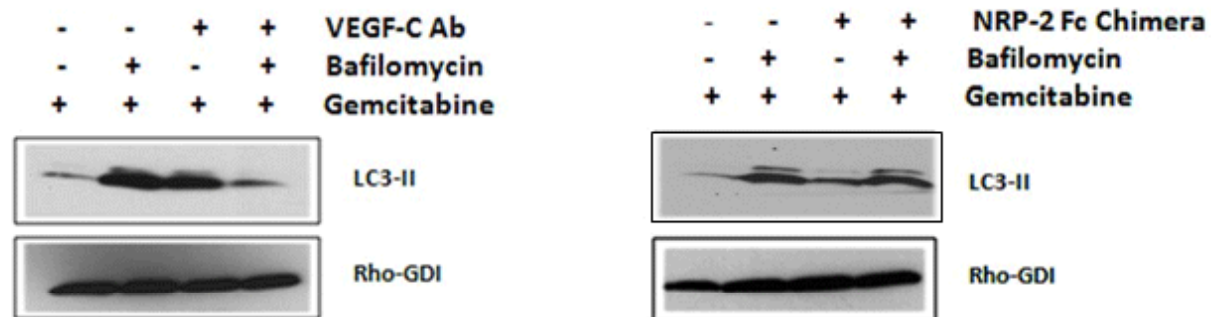

**Supplemental figure 5**

## Representative confocal images of cell viability in PC3 cells depleted of NRP-2

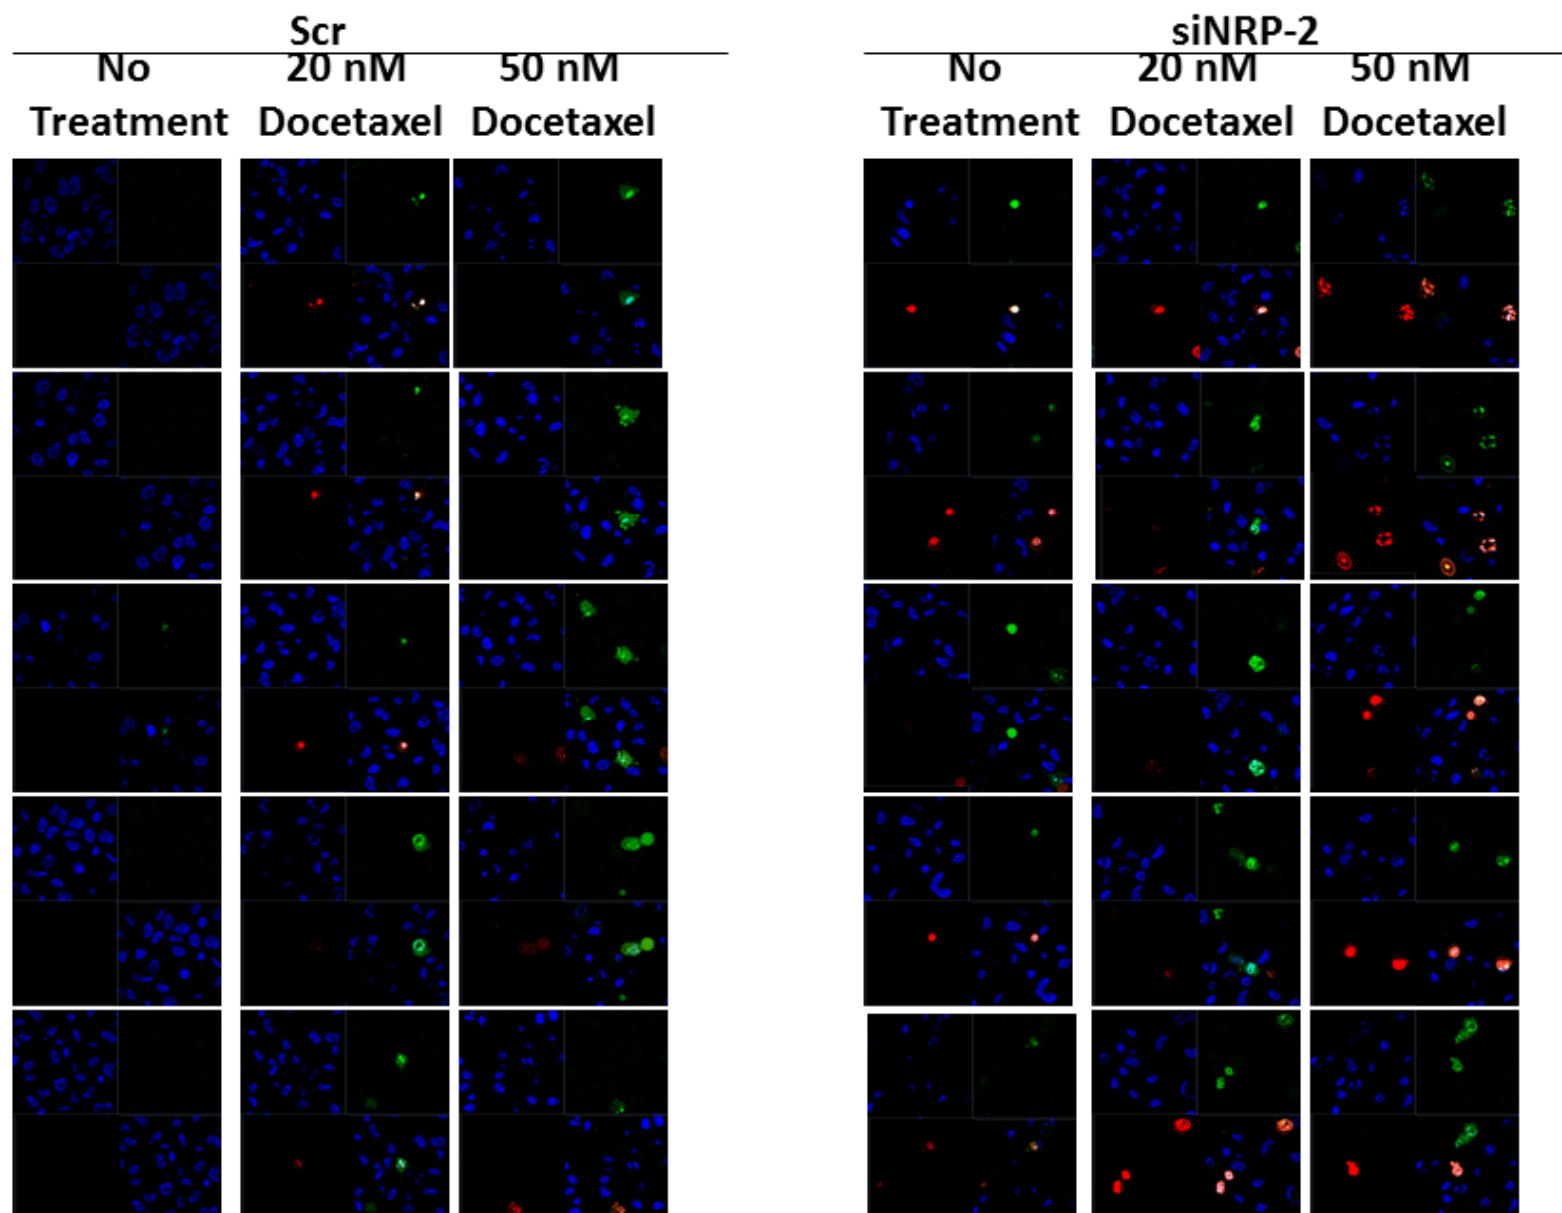

Supplemental figure 6

## Cell viability following treatment with NRP-2 siRNA for 48 hours

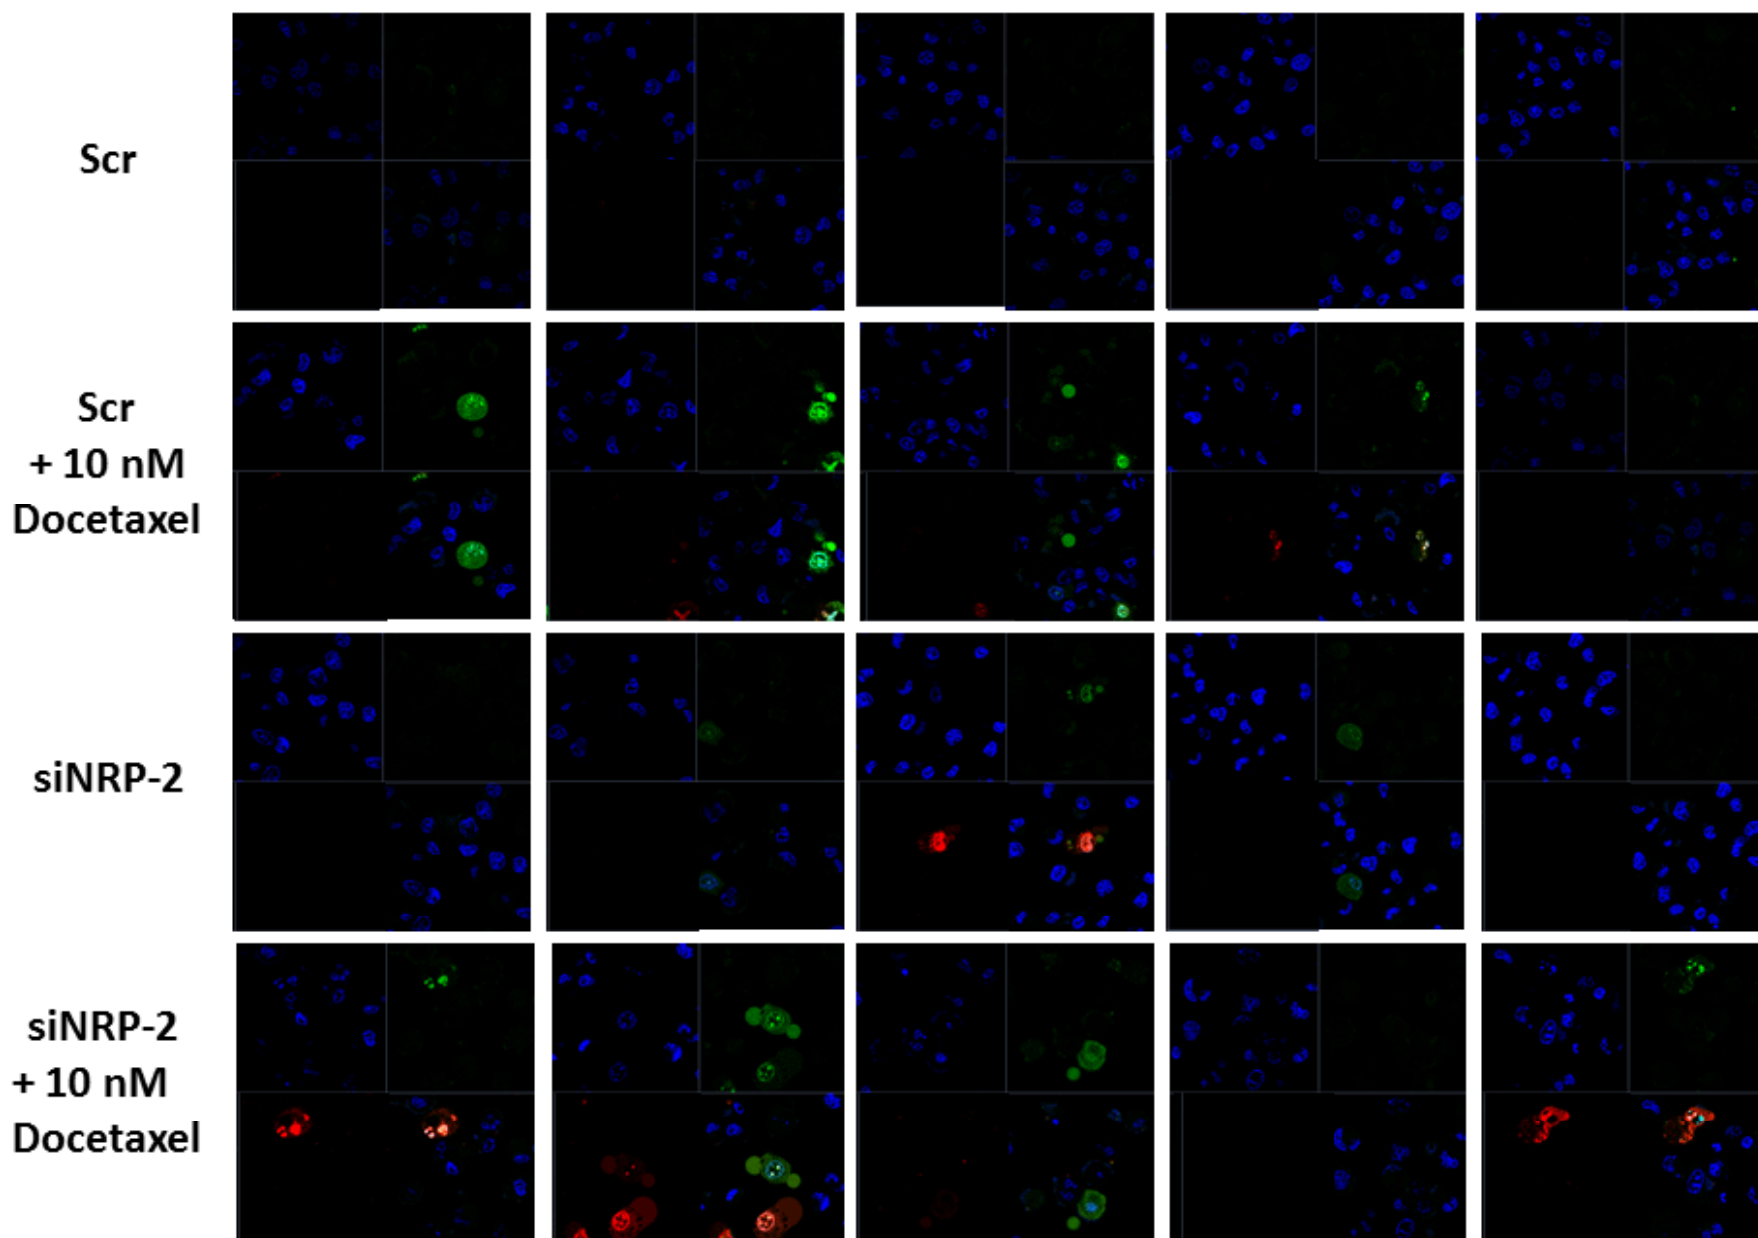

Supplemental figure 7

# Effect of treatment with BAFM on autophagy and cell survival

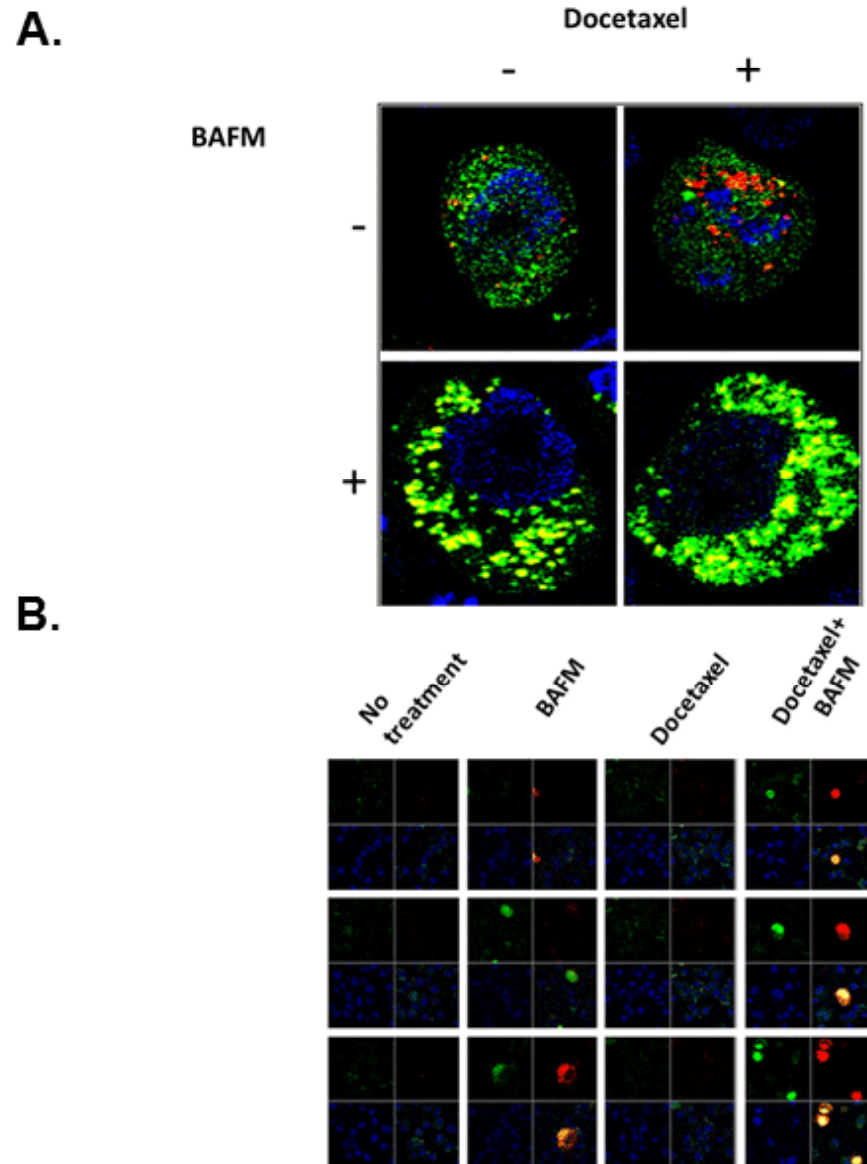

Supplemental Figure 8



# Representative images of C4-2B cells following treatment with exogenous VEGF-C, siNRP-2, and Bafilomycin A1 following 24 h docetaxel treatment

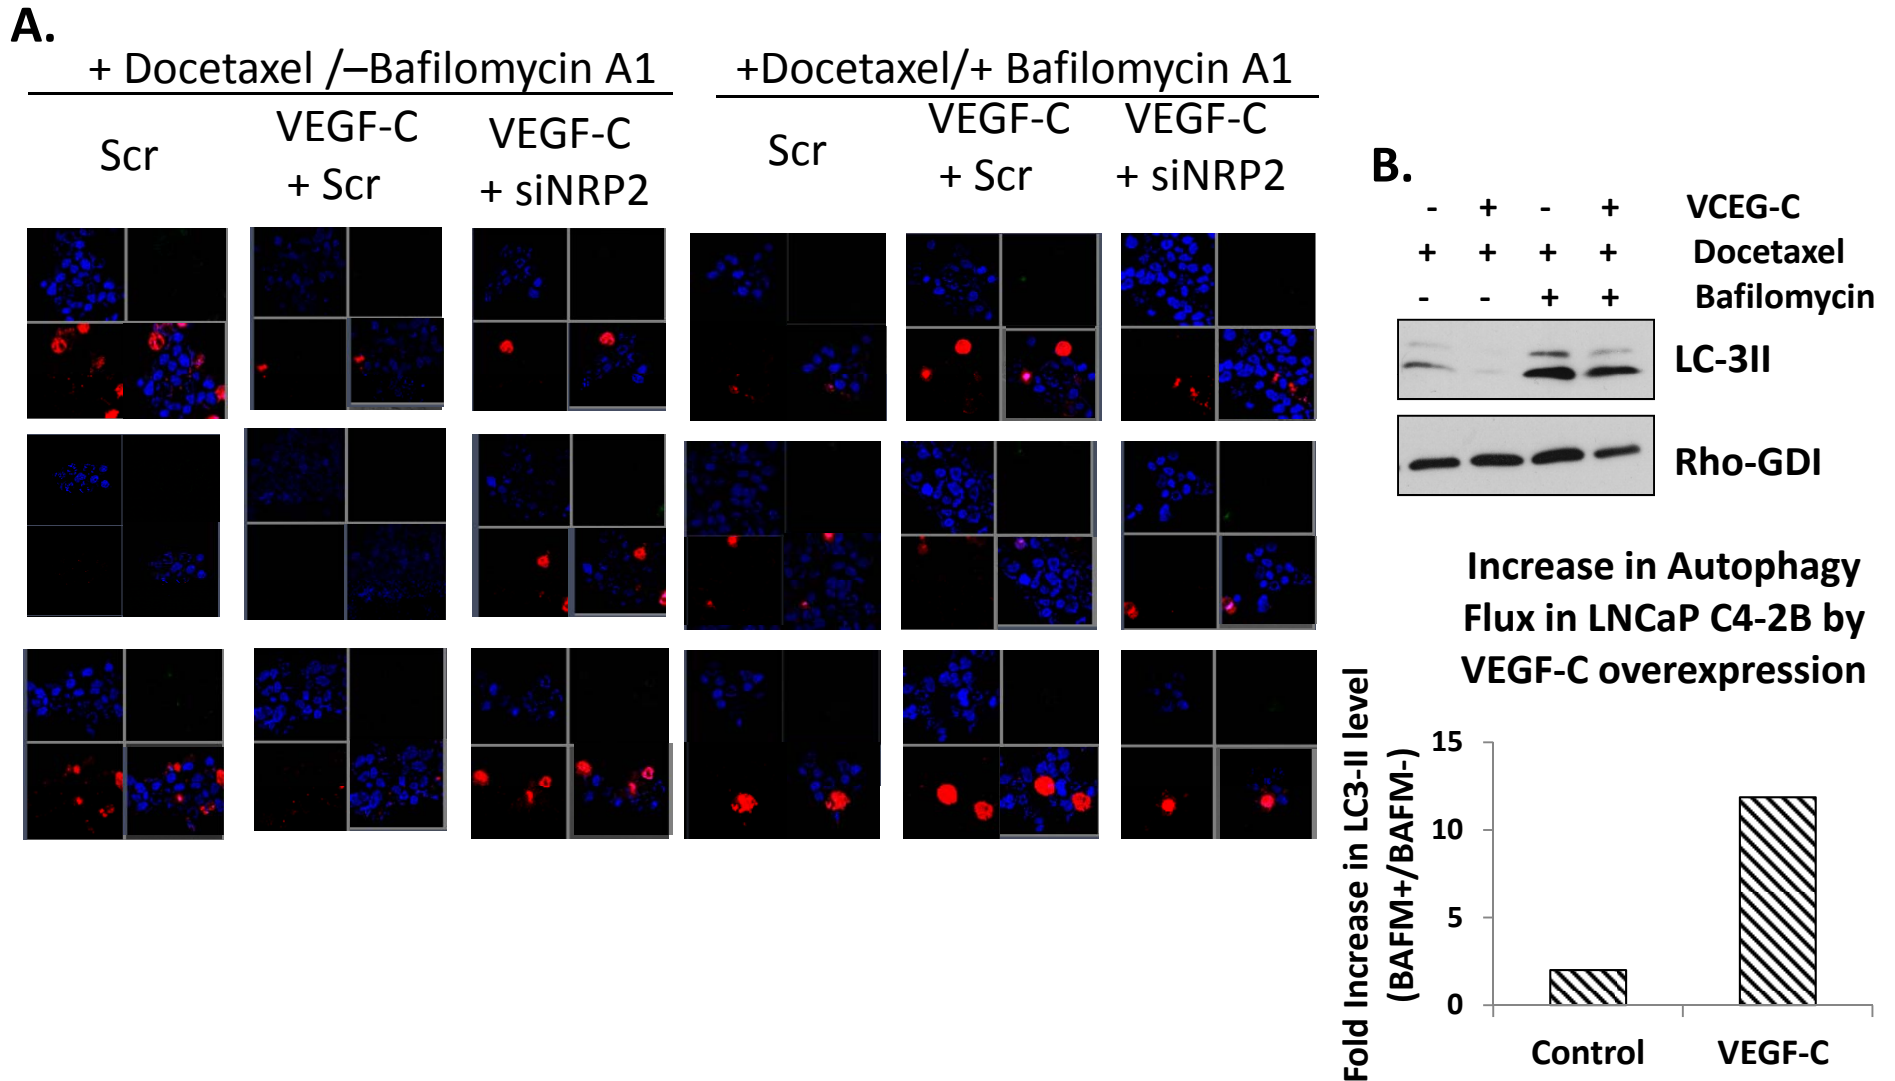

**Supplemental Figure 9**

**Representative images of C4-2 and C4-2 cells expressing VEGF-C following treatment with exogenous siNRP-2, and Bafilomycin A1 following 24 h docetaxel treatment**

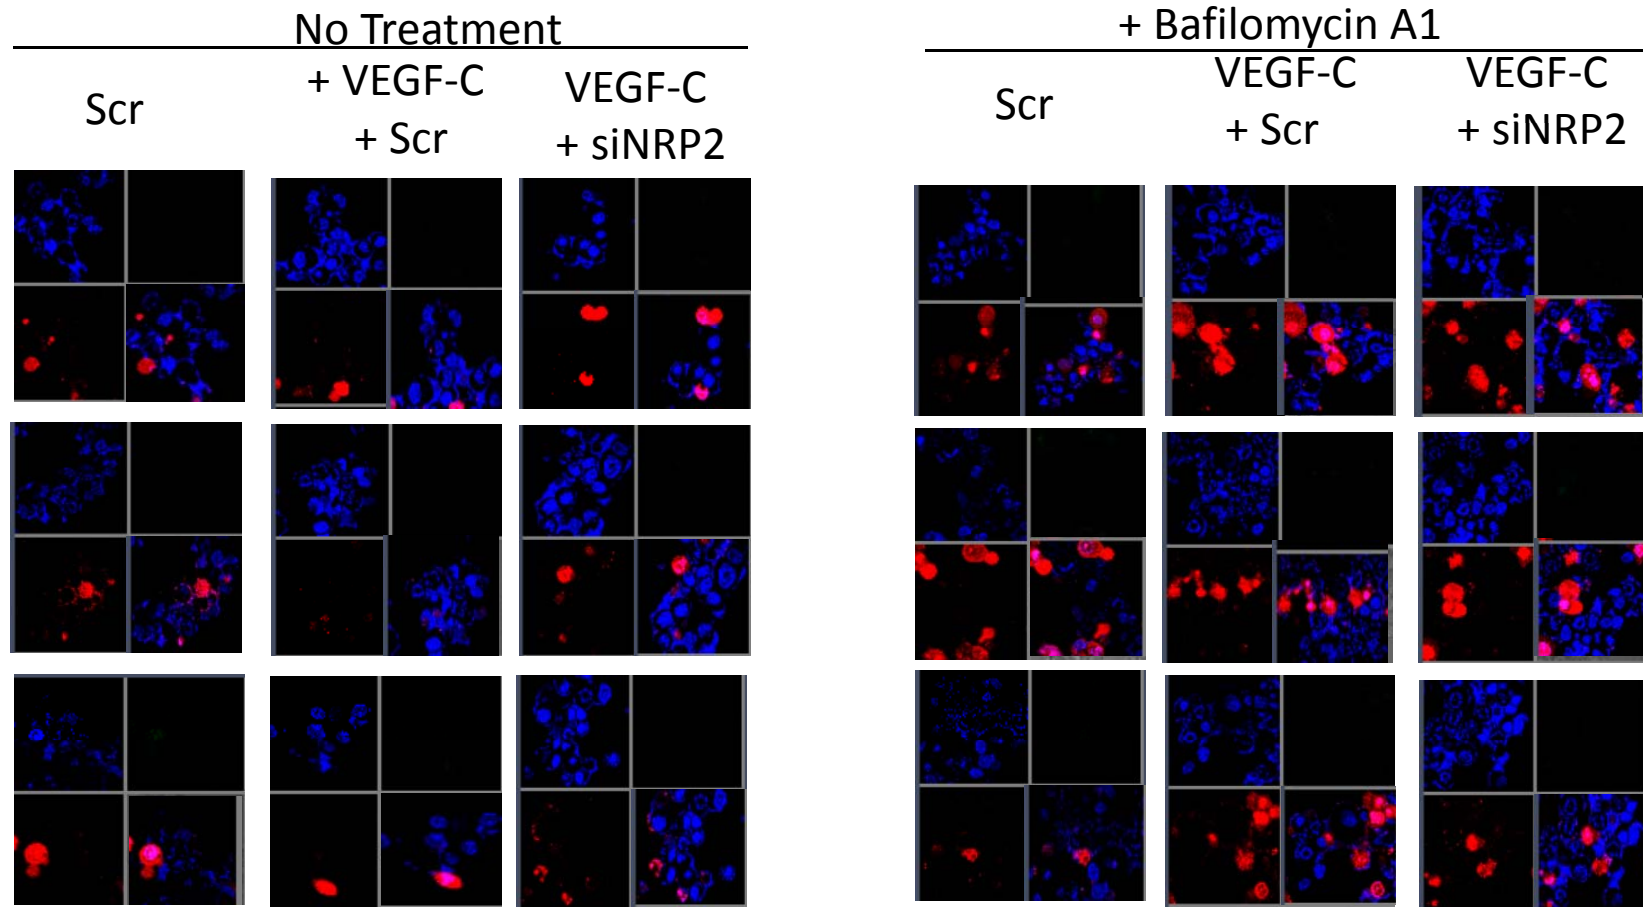

**Supplemental Figure 10**

## VEGF-C axis in Regulating PC3 Cell Death through Autophagy upon Docetaxel Treatment

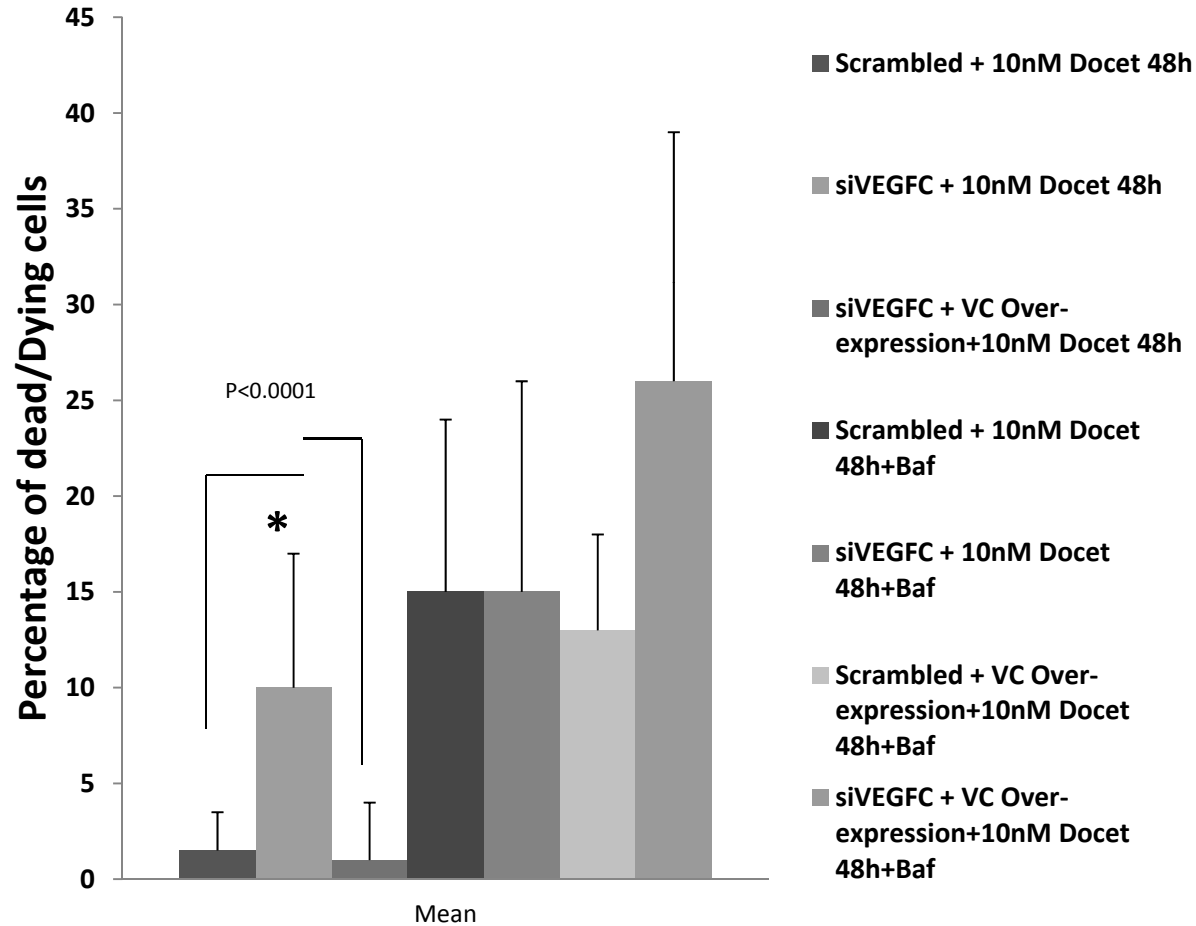

Supplemental Figure 11

Representative confocal images of Du145 cells treated with VEGF-C siRNA and docetaxel

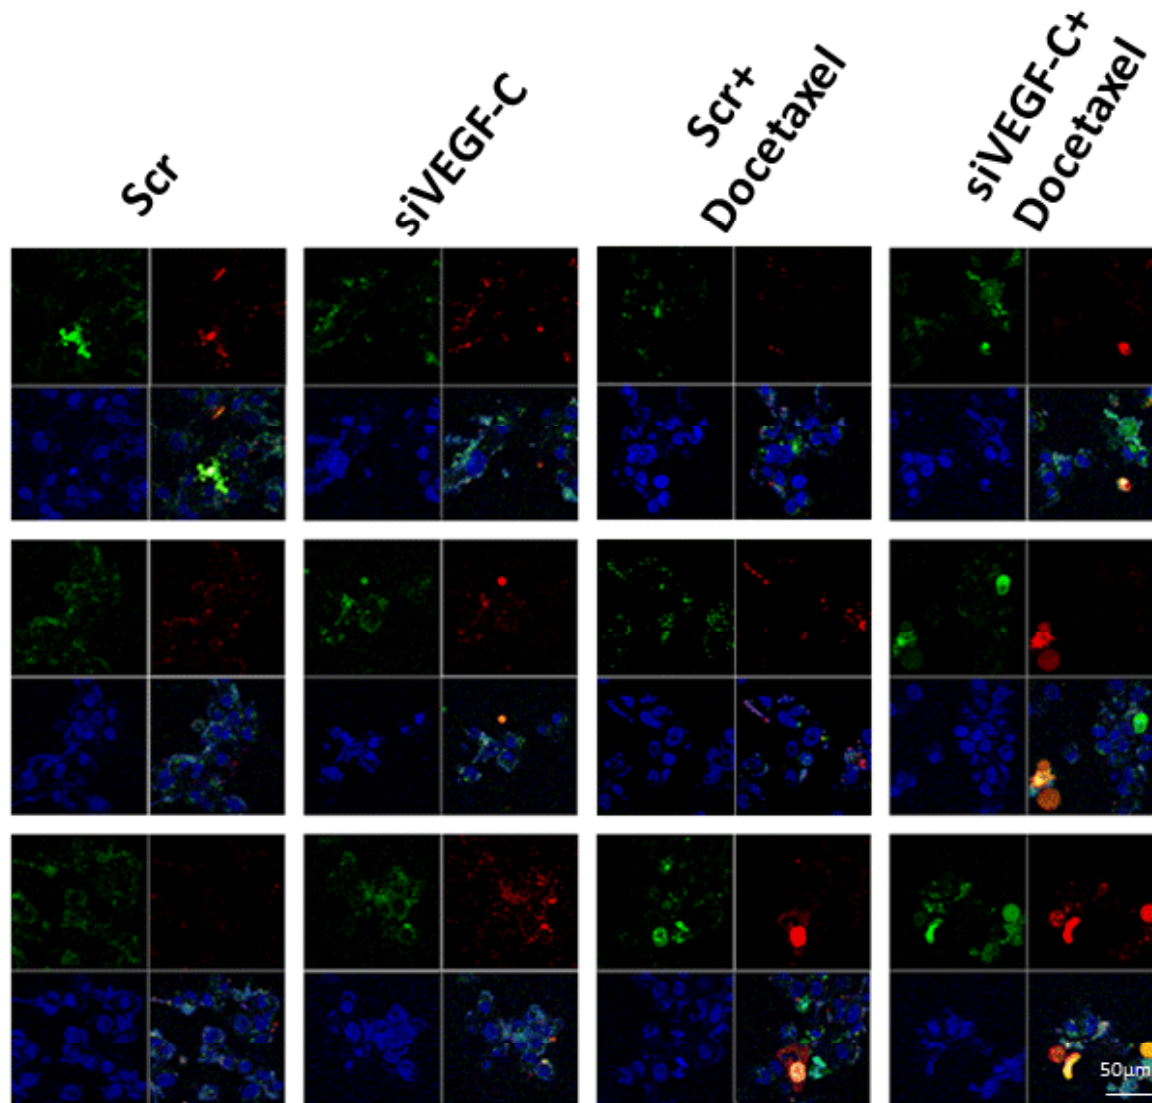

**Supplemental Figure 12**

**Representative confocal images of VEGF-C-depleted CaPan-1 cells treated with 10- and 20-nM doses of gemcitabine**

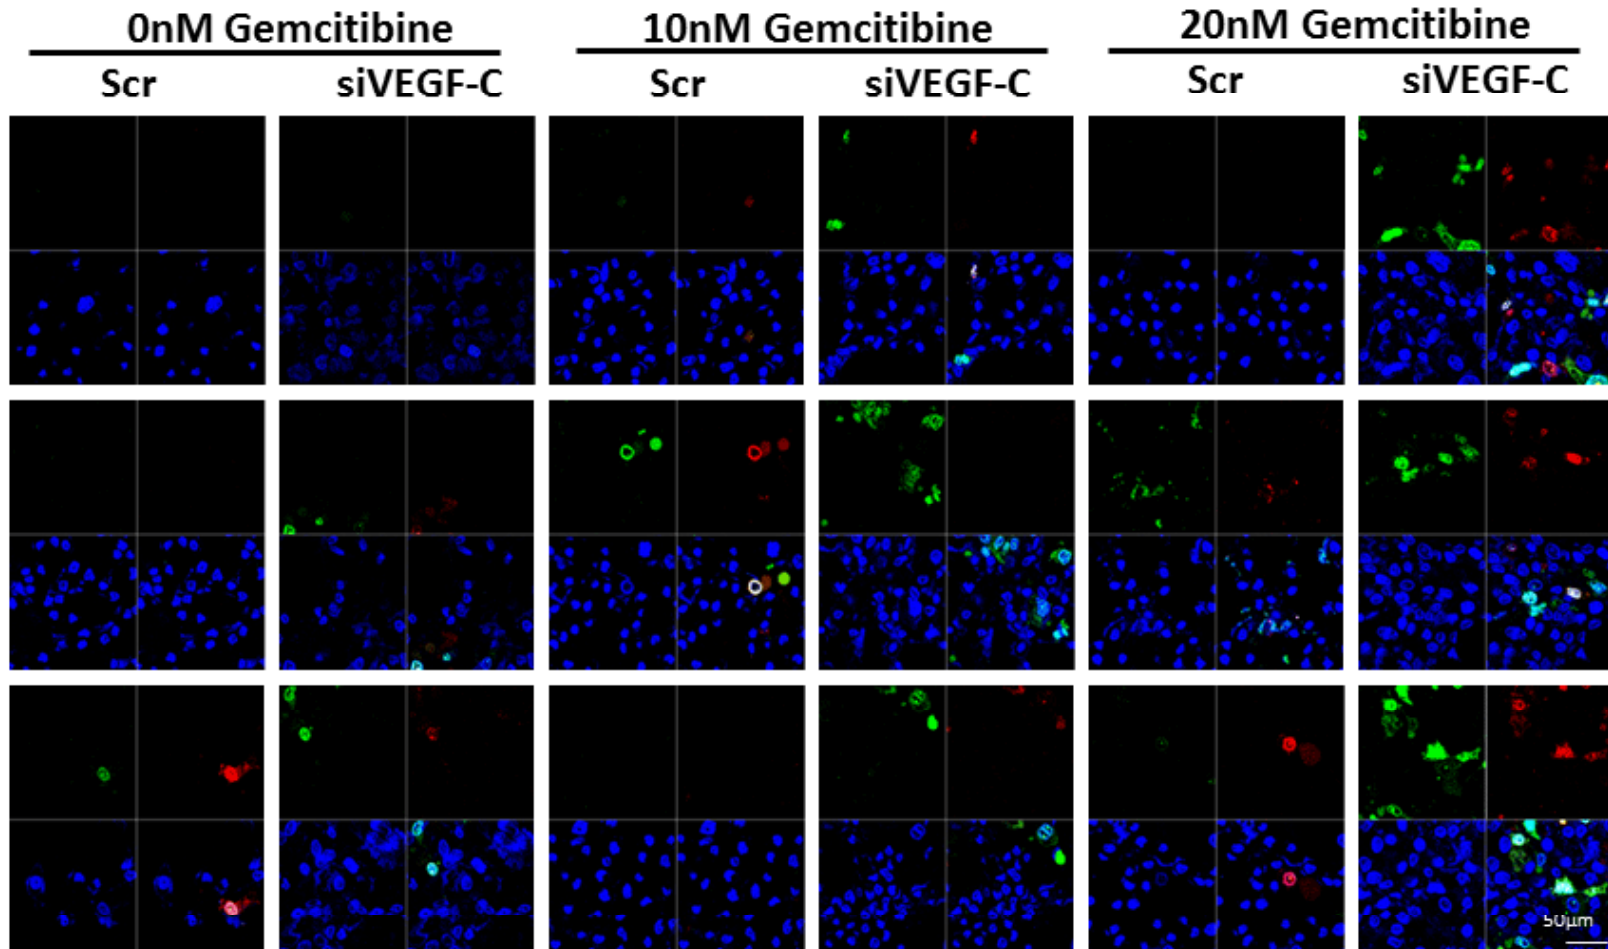

**Representative confocal images of NRP-2-depleted CaPan-1 cells treated with gemcitabine**

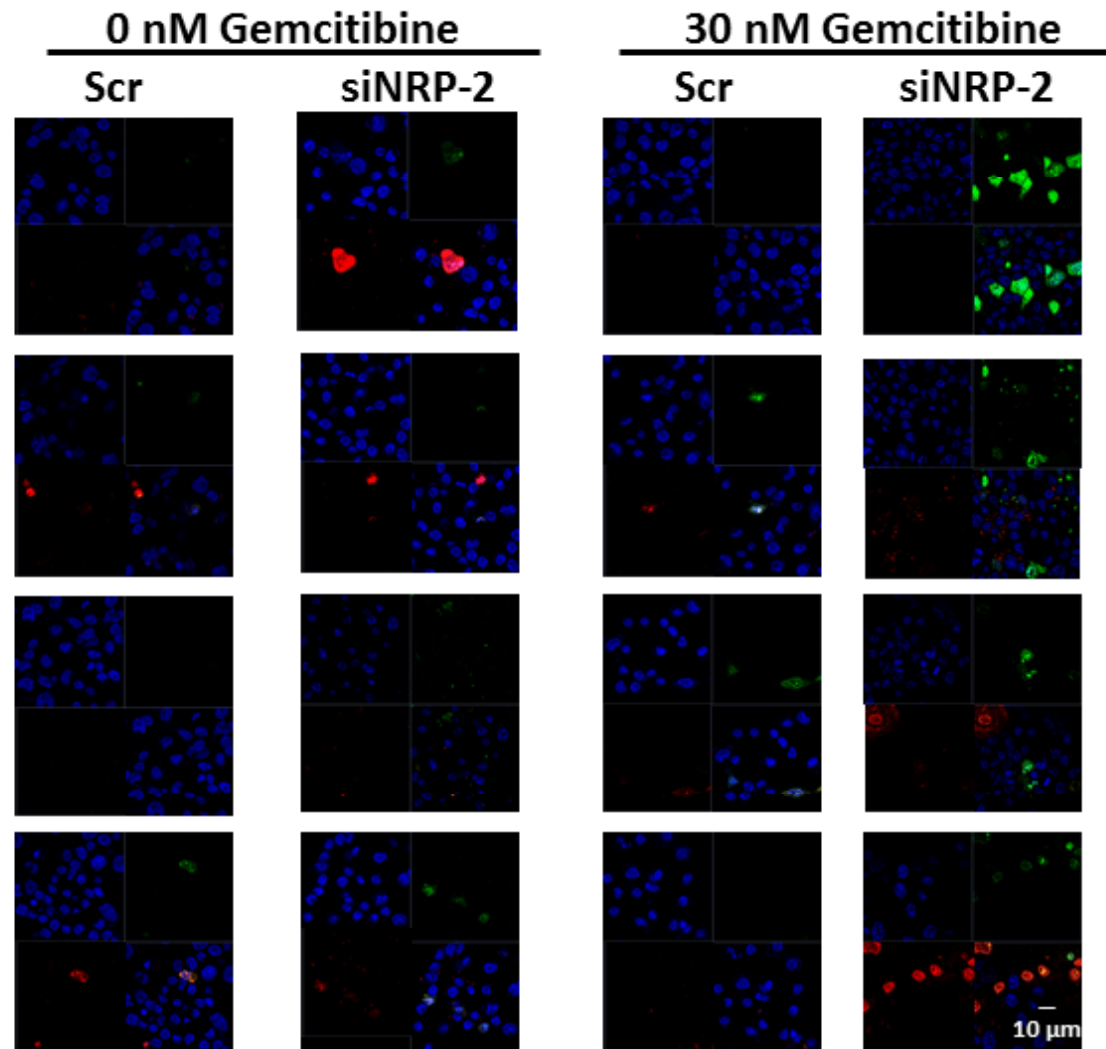

**Supplemental Figure 14**

# The effect of function-blocking VEGF-C antibody/soluble NRP-2 on CaPan-1 cell survival in the presence of gemcitabine

A.

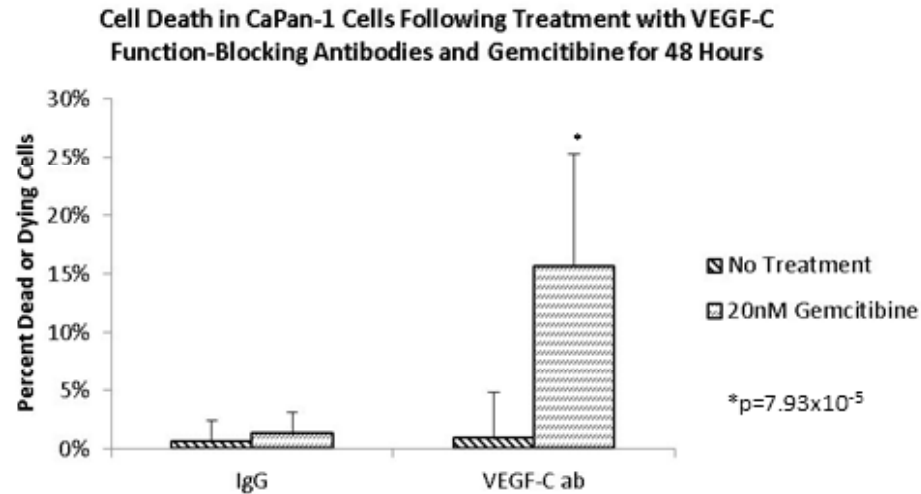

B.

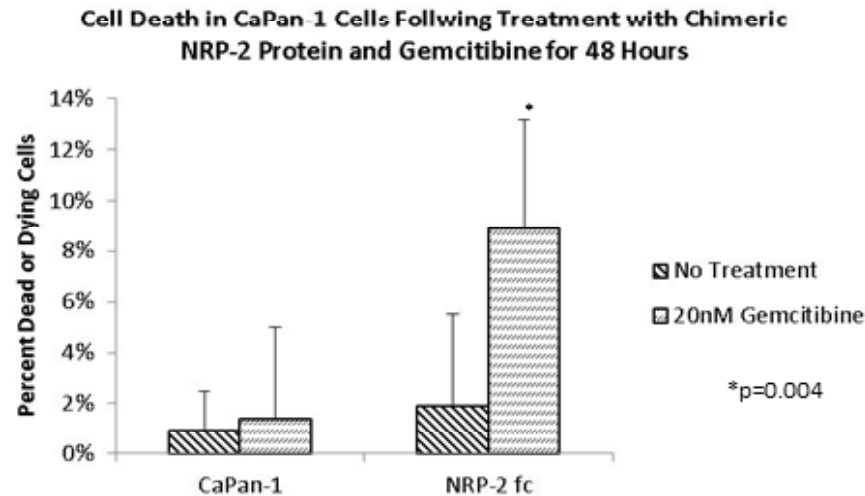



**Representative images of PC3 cells depleted of WDFY-1 and either VEGF-C or NRP-2**

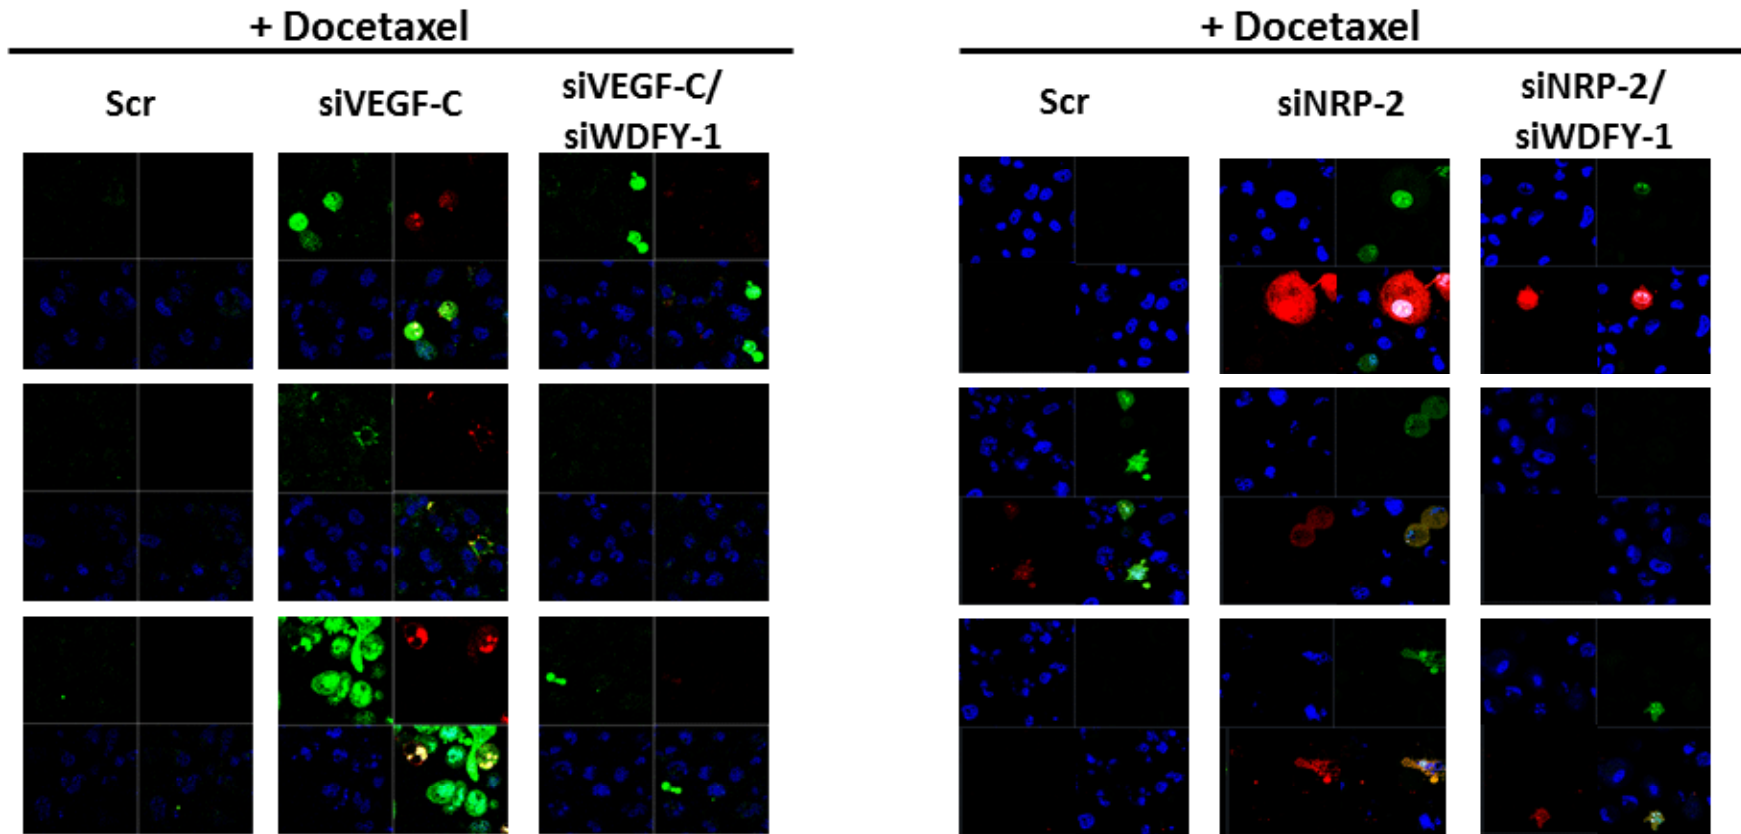

**Supplemental Figure 16**



# Inhibition of mTORC1 activity by VEGF-C

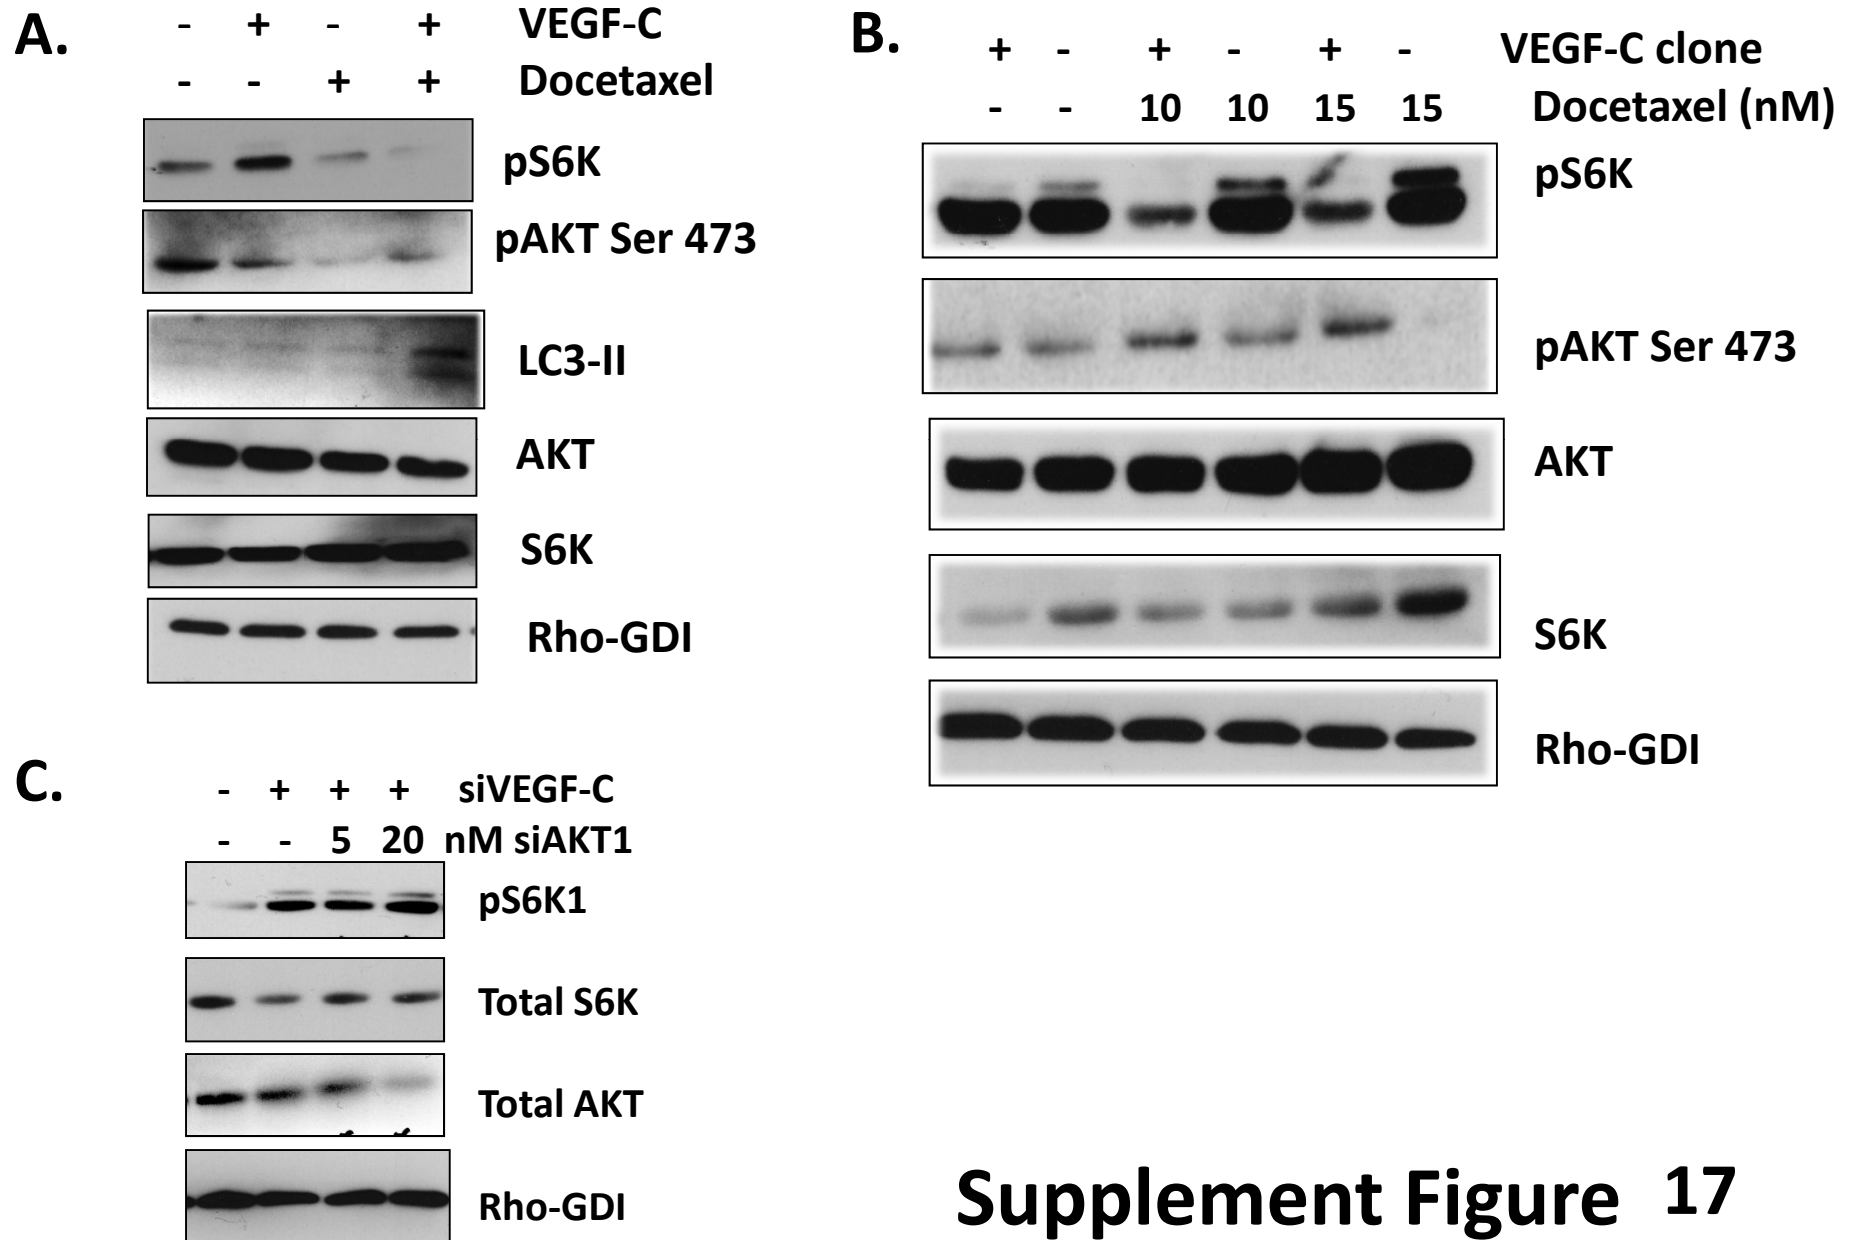

**Supplement Figure 17**
